# Supplementary material for: Semaphorin 3A reduces the severity of aGVHD by promoting M2 macrophage polarization
Source: Research Square preprint supplement (doi:10.21203/rs.3.rs-7904342/v1), 2026-02-11
Supplement: Supplementary file 1 [file b4cc956f0e39e432ccc3539f.xlsx]

## Sheet: Sheet1
Time point	Body weights of Control group (g)						Body weights of X-ray group (g)						Body weights of BM group (g)						Body weights of aGVHD group (g)						Body weights of S-aGVHD group (g)
	Control-1	Control-2	Control-3	Control-4	Control-5	Control-6	X-ray-1	X-ray-2	X-ray-3	X-ray-4	X-ray-5	X-ray-6	BM-1	BM-2	BM-3	BM-4	BM-5	BM-6	aGVHD-1	aGVHD-2	aGVHD-3	aGVHD-4	aGVHD-5	aGVHD-6	S-aGVHD-1	S-aGVHD-2	S-aGVHD-3	S-aGVHD-4	S-aGVHD-5	S-aGVHD-6
0 Day	21.13	23.47	22.58	23.24	23.34	22.54	21.28	21.17	22.36	22.27	21.46	22.4	20.76	21.57	21.73	22.72	22.03	23.21	22.37	22.72	21.87	23.46	23.87	22.65	21.95	23.02	24.3	22.36	21.59	22.93
2 Day	22.26	23.95	22.43	23.52	23.7	22.65	18.4	18.83	19.15	20.04	19.11	19.9	18.36	19.73	19.76	19.69	20.87	21.58	19.8	20.56	19.48	21.2	21.56	19.75	19.86	21.39	21.47	20.98	19.77	20.86
4 Day	22.06	23.29	23.3	23.72	23.23	22.69	18.23	18.56	18.17	18.8	18.05	19.02	17.21	17.44	17.84	17.68	19.78	20.38	17.64	18.73	17.53	18.66	19.38	18.72	18.51	20.51	20.12	19.68	18.68	18.95
6 Day	21.46	23.59	22.92	23.25	23.45	22.74	17.42	18.01	17.13	17.82	17.08	17.96	17.22	18.12	18.78	18.11	20.03	19.86	16.62	17.19	16.36	17.67	17.86	16.33	16.48	19.19	18.21	17.11	17.2	18.05
8 Day	21.77	23.83	23.3	23.19	23.47	22.78	17.51	17.95	17.1	17.73	16.95	17.81	18.26	19.16	19.63	20.48	19.43	19.98	16.3	16.74	16.3	16.85	16.45	17.47	16.36	17.72	17.72	16.65	17.1	18.85
10 Day	22.65	23.65	23.41	23.82	23.85	23.05	17.34	17.58	16.88	17.16	16.62	17.14	19.48	19.51	19.85	20.75	20.55	20.22	17.04	16.62	16.52	16.76	16.42	17.77	18.22	18.21	18.87	17.46	17.35	19.16
12 Day	22.51	23.92	23.35	24.02	24.06	23.11							19.86	19.94	20.08	21.42	20.96	20.63	17.26	16.55	16.55	16.9	16.83	17.79	18.35	18.69	18.45	18.05	17.84	19.34
14 Day	22.97	23.88	23.54	24.38	24.45	23.15							20.13	20.61	20.85	21.81	21.15	21.24	17.45	16.69	16.86	17.04	17.06	18.05	19.47	19.11	18.96	18.23	18.15	19.58
