# Supplementary figures and images for: Semaphorin 3A reduces the severity of aGVHD by promoting M2 macrophage polarization
Source: Research Square preprint supplement (doi:10.21203/rs.3.rs-7904342/v1), 2026-02-11

**Figure 5F**

$\beta$ -actin

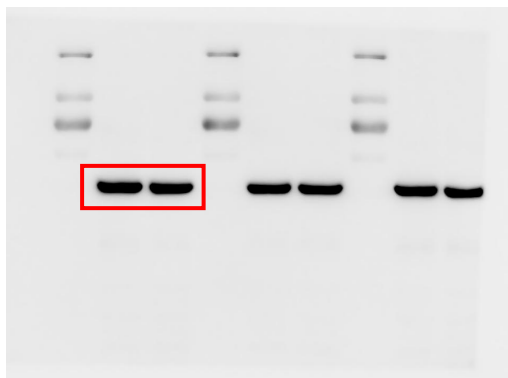

IL-17RA

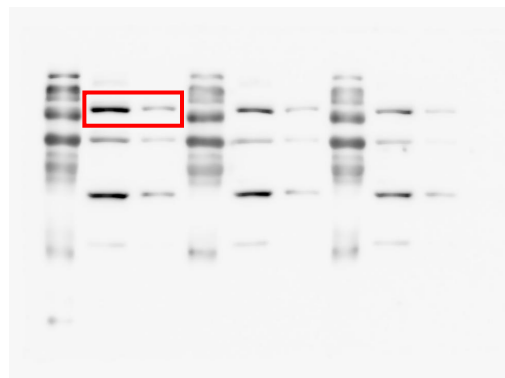

**Figure 5G**

$\beta$ -actin

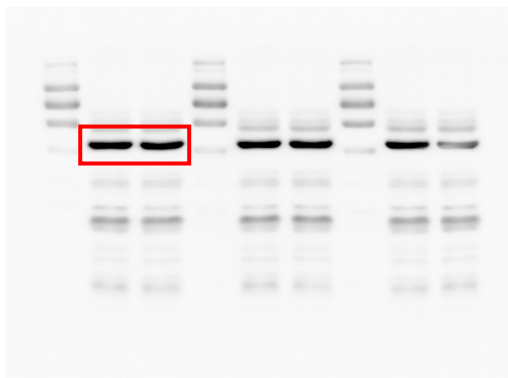

IL-17A

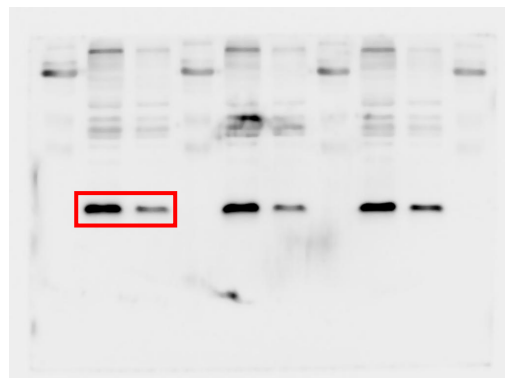

Supplement: Supplementary file 1 [file 4bf3156f8739f170fdb71bdb.pdf]
